# Supplementary material
Source: MDPI journal article supplement (https://www.mdpi.com/1999-4907/12/3/376)
Supplement: s1 [file s1]

## Supplement material

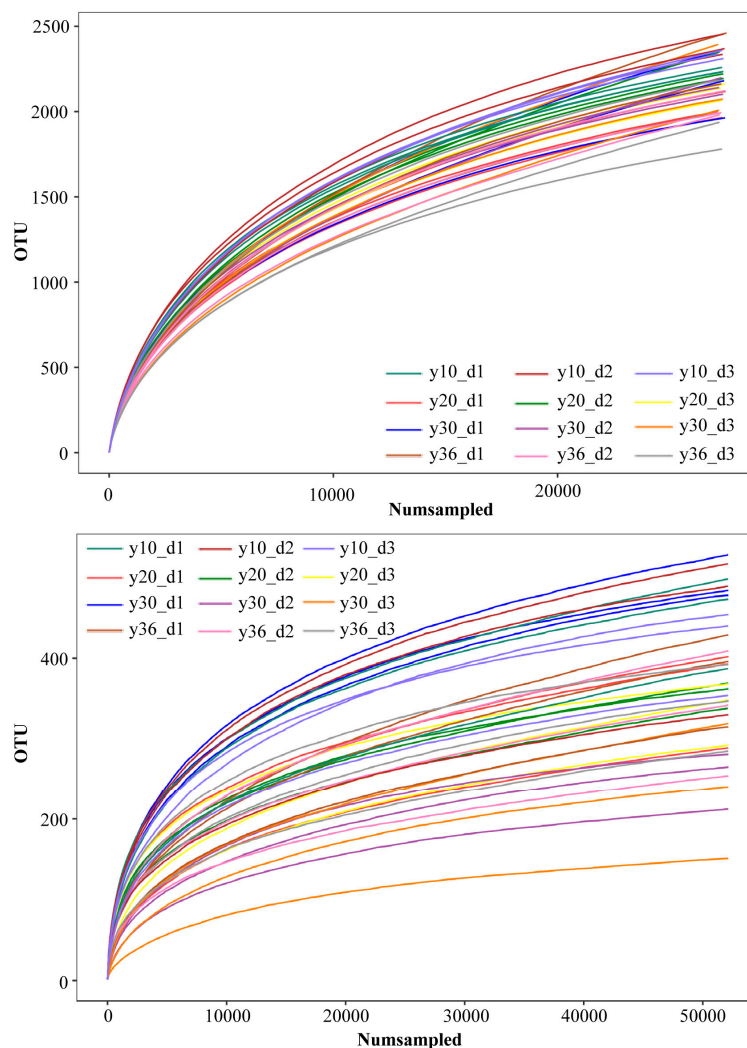

**Figure S1.** Rarefaction curves of bacteria (a) and fungi (b). The abscissa represents the sequence obtained by sequencing, and the ordinate represents the corresponding number of OTU. y10\_d1: 0–20 cm soil depth of 10-year stand; y10\_d2: 20–40 cm soil depth of 10-year stand, y10\_d3: 40–60 cm soil depth of 10-year stand; y20\_d1: 0–20 cm soil depth of 20-year stand; y20\_d2: 20–40 cm soil depth of 20-year stand, y20\_d3: 40–60 cm soil depth of 20-year stand; y30\_d1: 0–20 cm soil depth of 30-year stand; y30\_d2: 20–40 cm soil depth of 30-year stand, y30\_d3: 40–60 cm soil depth of 30-year stand; y36\_d1: 0–20 cm soil depth of 36-year stand; y36\_d2: 20–40 cm soil depth of 36-year stand, y36\_d3: 40–60 cm soil depth of 36-year stand.
